# Supplementary material
Source: MDPI journal article supplement (https://www.mdpi.com/2227-9040/9/10/274)
Supplement: s1 [file s1 › chemosensors-1343260-supplementary.pdf]

## ***SUPPORTING INFORMATION***

Potentiometric C<sub>2</sub>H<sub>4</sub>-selective detection on  
solid-state sensors activated with bi-functional  
catalytic nanoparticles

*Fidel Toldra-Reig and Jose Manuel Serra\**

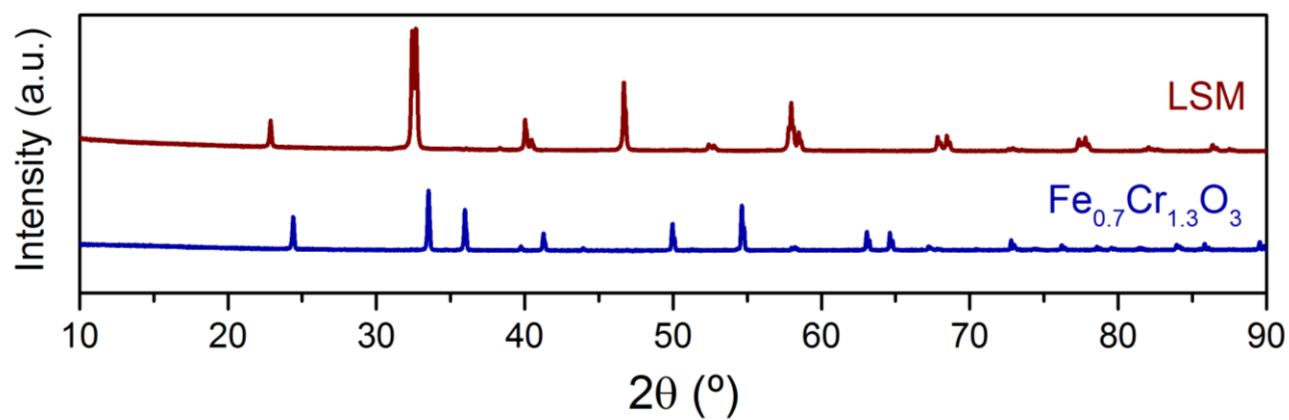

Figure S1 X-ray diffraction pattern of both LSM and  $\text{Fe}_{0.7}\text{Cr}_{1.3}\text{O}_3$  powders at room temperature

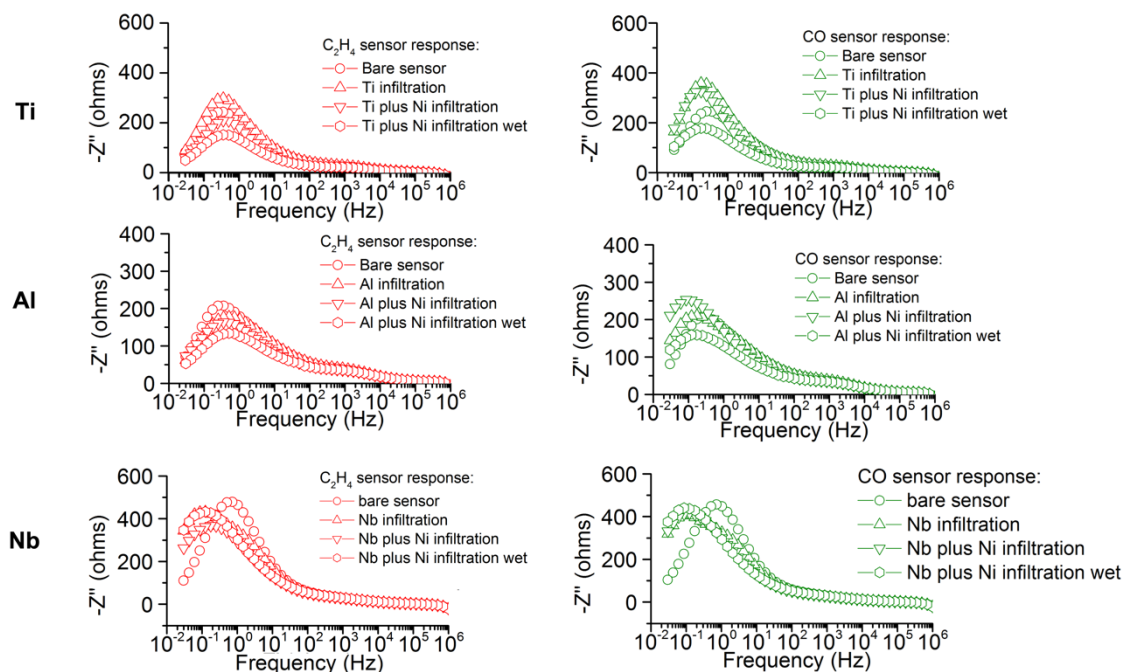

Figure S2.- Bode plots for devices infiltrated with Ti, Al and Nb for the bare sensor (dots), first infiltration (triangle), additional infiltration with Ni in dry conditions (inverse triangle) and additional infiltration with nickel in wet conditions (hexagon).  $C_2H_4$  response is depicted in red in the left side and CO response is shown in green in the right side. The bode plots correspond to the Nyquist plots depicted in Figure 6

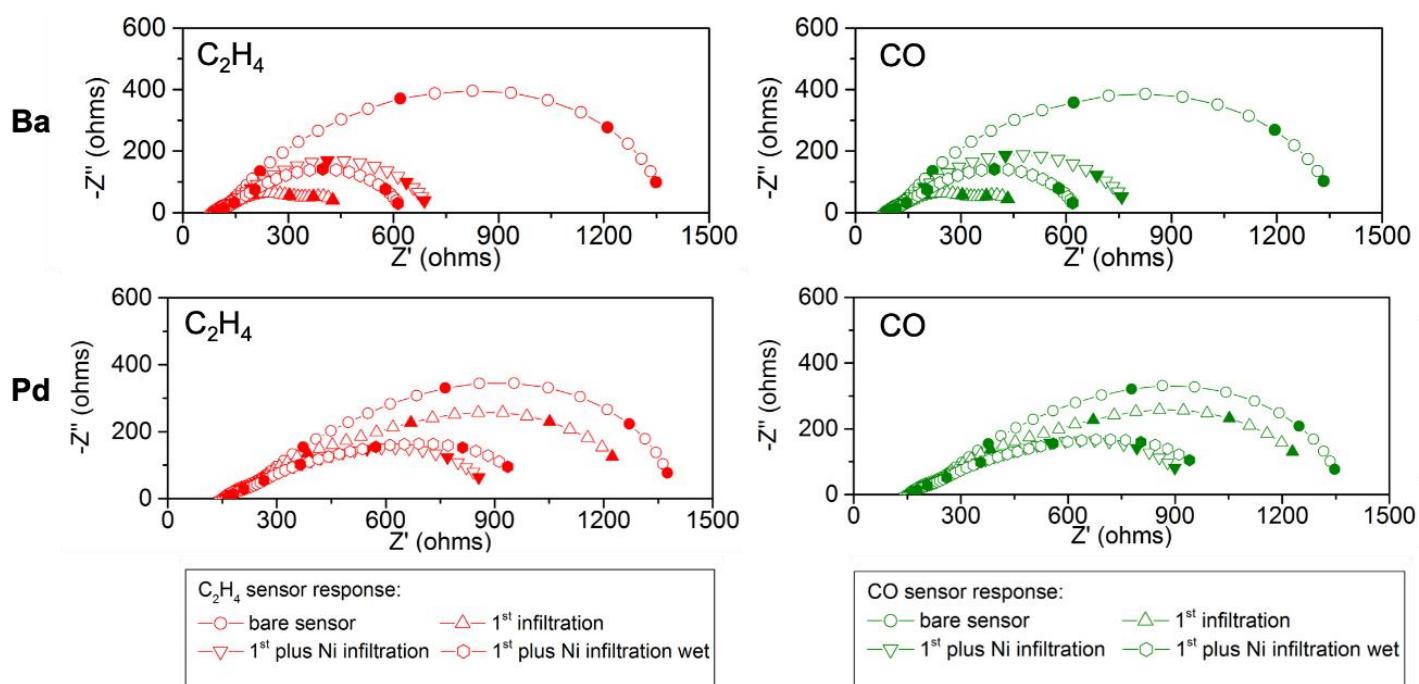

Figure S3.- EIS results for the devices infiltrated with Ba and Pd for the bare sensor (dots), first infiltration (triangle), additional infiltration with nickel in dry conditions (inverse triangle) and additional infiltration with nickel in wet conditions (hexagon). C<sub>2</sub>H<sub>4</sub> response is depicted in red in the left side and CO response is shown in green in the right side
